# Supplementary material for: A multifunctional nanoplatform for cancer chemo-photothermal synergistic therapy and overcoming multidrug resistance
Source: Royal Society of Chemistry journal article supplement (doi:10.1039/c7bm01206c), 2018-01-01
Supplement: c7bm01206c1.pdf [file c7bm01206c1.pdf]

## ***Supporting Information***

### **A multifunctional nanoplatform for cancer chemo-photothermal synergistic therapy and overcoming multidrug resistance**

Yunmei Peng,<sup>a,b,1</sup> Junpeng Nie,<sup>a,b,1</sup> Wei Cheng,<sup>b,1</sup> Gan Liu,<sup>c</sup> Dunwan Zhu,<sup>d,\*</sup> Linhua Zhang,<sup>d</sup> Chaoyu Liang,<sup>b</sup> Lin Mei,<sup>c</sup> Laiqiang Huang,<sup>a,b,\*</sup> and Xiaowei Zeng<sup>a,b,c,\*</sup>

<sup>a</sup> *School of Life Sciences, Tsinghua University, Beijing 100084, China*

<sup>b</sup> *Division of Life and Health Sciences, Graduate School at Shenzhen, Tsinghua University, Shenzhen 518055, China*

<sup>c</sup> *School of Pharmaceutical Sciences (Shenzhen), Sun Yat-sen University, Guangzhou 510275, China*

<sup>d</sup> *Institute of Biomedical Engineering, Chinese Academy of Medical Sciences & Peking Union Medical College, Tianjin Key Laboratory of Biomedical Materials, Tianjin 300192, China*

<sup>1</sup> These authors contributed equally to this work.

\* Corresponding authors.

E-mail: zeng.xiaowei@sz.tsinghua.edu.cn or xwzeng@163.com (X. Zeng)

E-mail: huanglq@sz.tsinghua.edu.cn (L. Huang)

E-mail: zhudunwan@bme.pumc.edu.cn (D. Zhu)

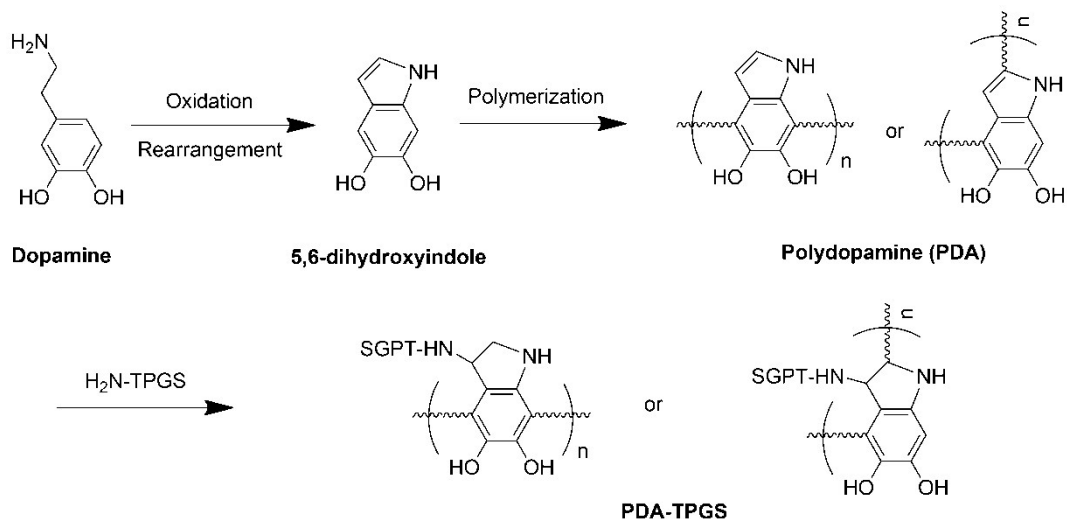

**Scheme S1.** The oxidative self-polymerization mechanism of dopamine and the conjugation mechanism between H<sub>2</sub>N-TPGS and PDA coating.

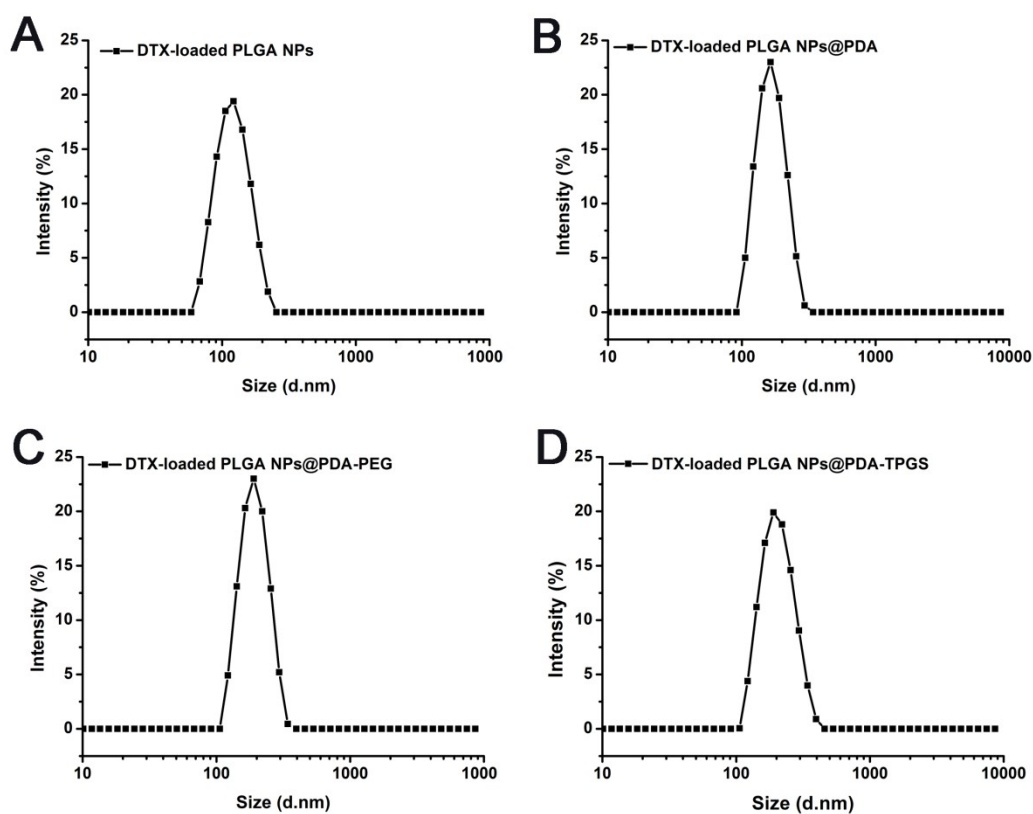

**Figure S1.** DLS size distribution of DTX-loaded PLGA NPs (A), PLGA NPs@PDA (B), PLGA NPs@PDA-PEG (C) and PLGA NPs@PDA-TPGS (D).

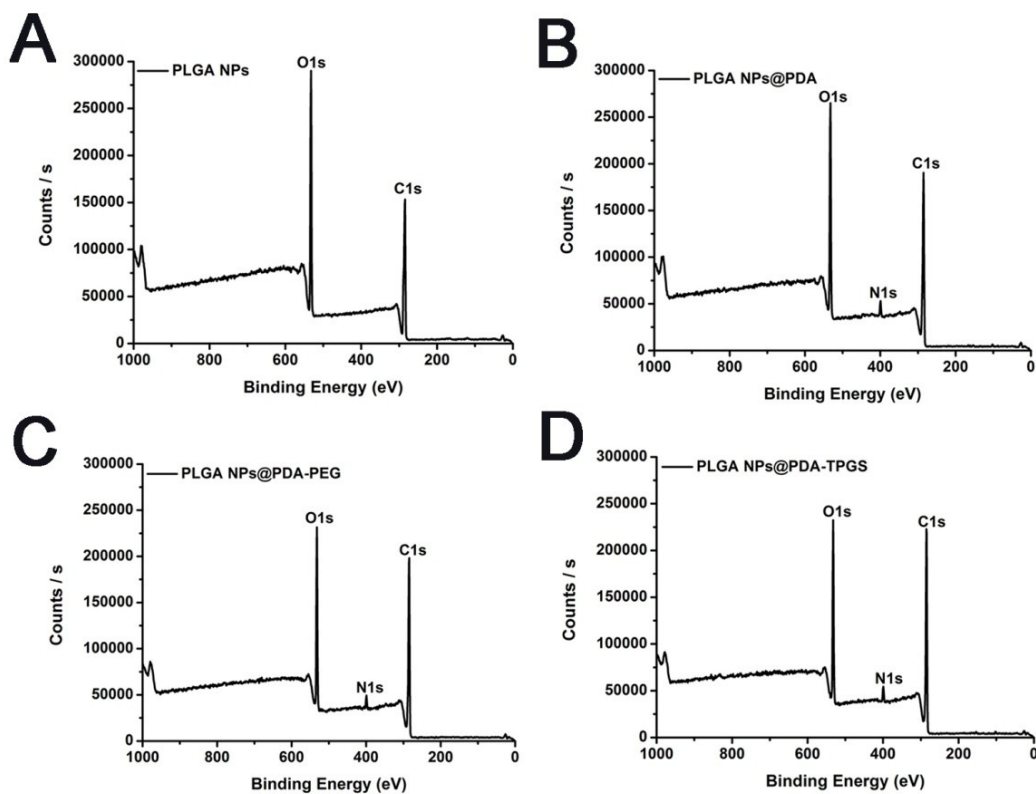

**Figure S2.** XPS spectra analysis of PLGA NPs, PLGA NPs@PDA, PLGA NPs@PDA-PEG and PLGA NPs@PDA-TPGS.

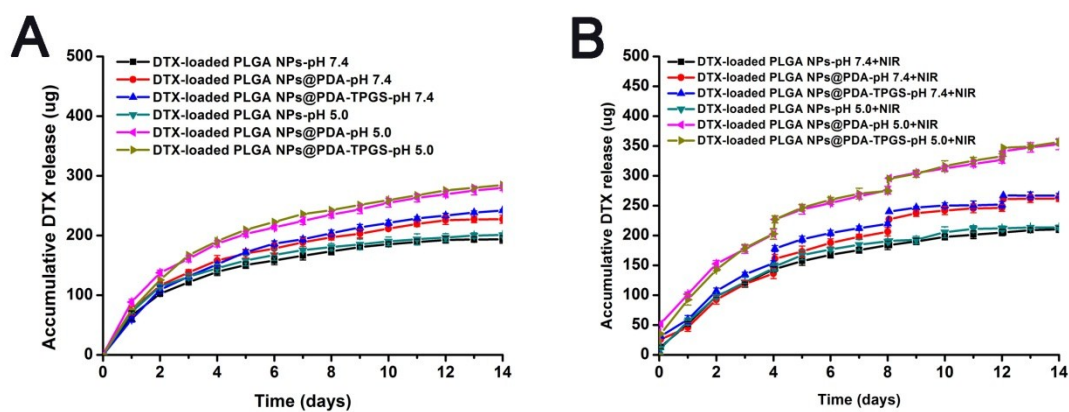

**Figure S3.** *In vitro* release profiles of the DTX-loaded PLGA NPs, DTX-loaded PLGA NPs@PDA and DTX-loaded PLGA NPs@PDA-TPGS. (A) without NIR; (B) with NIR.

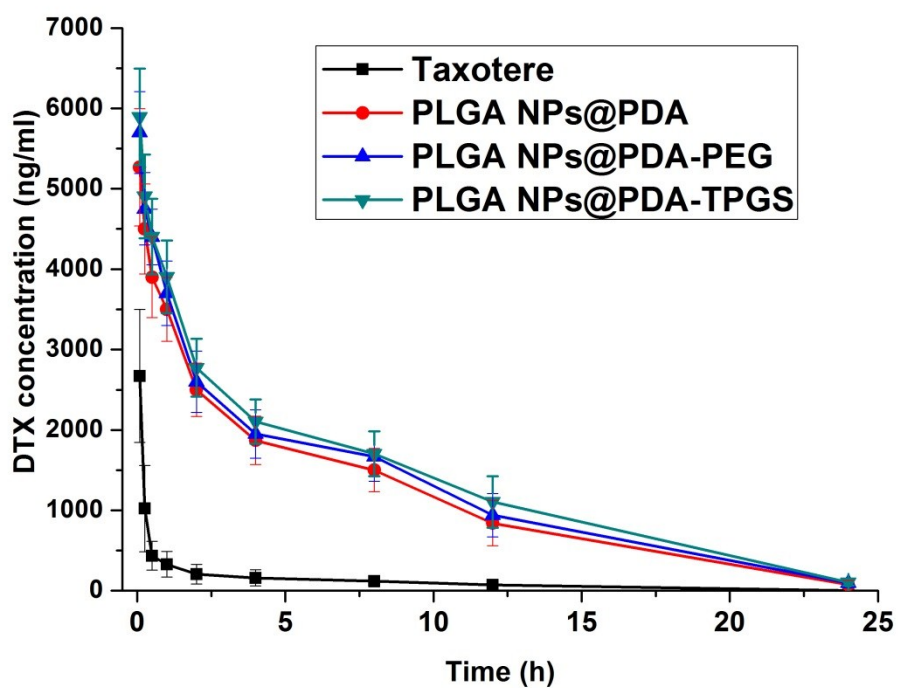

**Figure S4.** DTX concentration-time profile following intravenous administration of Taxotere®, DTX-loaded PLGA NPs@PDA, DTX-loaded PLGA NPs@PDA-PEG and DTX-loaded PLGA NPs@PDA-TPGS in SD rats at the DTX dose of 10 mg/kg (n = 5).

**Table S1.** The dispersivity of DTX-loaded PLGA NPs@PDA-TPGS in PBS and DMEM

| Samples(n=3)                         | Size (nm)   | PDI   | ZP(mV)  |
|--------------------------------------|-------------|-------|---------|
| DTX-loaded PLGA NPs @PDA-TPGS (PBS)  | 181.2 ± 2.8 | 0.129 | 3.2±0.3 |
| DTX-loaded PLGA NPs @PDA-TPGS (DMEM) | 179.5 ± 5.7 | 0.113 | 3.5±0.3 |

**Table S2.** IC<sub>50</sub> values of Taxotere<sup>®</sup>, DTX-loaded PLGA NPs@PAD-PEG, DTX-loaded PLGA NPs@PAD-TPGS and DTX-loaded PLGA NPs@PAD-TPGS+NIR on MCF-7 cells after 24 h and 48 h incubation

| Incubation time (h) | IC <sub>50</sub> (µg/ml) |                               |                               |                                  |
|---------------------|--------------------------|-------------------------------|-------------------------------|----------------------------------|
|                     | Taxotere <sup>®</sup>    | DTX-loaded PLGA NPs @ PAD-PEG | DTX-loaded PLGA NPs @PAD-TPGS | DTX-loaded PLGA NPs@PAD-TPGS+NIR |
| 24                  | 19.21±1.53               | 21.61±1.37                    | 23.00±1.45                    | 10.77±1.87                       |
| 48                  | 10.96±0.78               | 4.64±0.69                     | 2.16±0.73                     | 1.41±0.45                        |

**Table S3.** IC<sub>50</sub> values of Taxotere®, DTX-loaded PLGA NPs@PAD-PEG, DTX-loaded PLGA NPs@PAD-TPGS and DTX-loaded PLGA NPs@PAD-TPGS+NIR on MCF-7/ADR cells after 24 h and 48 h incubation

| Incubation<br>time (h) | IC <sub>50</sub> (µg/ml) |                                     |                                     |                                         |
|------------------------|--------------------------|-------------------------------------|-------------------------------------|-----------------------------------------|
|                        | Taxotere®                | DTX-loaded<br>PLGA NPs @<br>PAD-PEG | DTX-loaded<br>PLGA NPs<br>@PAD-TPGS | DTX-loaded PLGA<br>NPs@PAD-<br>TPGS+NIR |
| 24                     | 17.06±1.829              | 22.45±1,92                          | 5.65±1,37                           | 1.45±1.09                               |
| 48                     | 73±0.66                  | 4.25±0.54                           | 1.59±0.61                           | 0.67±0.39                               |
